# Supplementary material
Source: publisher figshare collection journal article supplement (https://gsajournals.figshare.com/ndownloader/files/23392553)
Supplement: Supplementary file 1 [file 23392553]

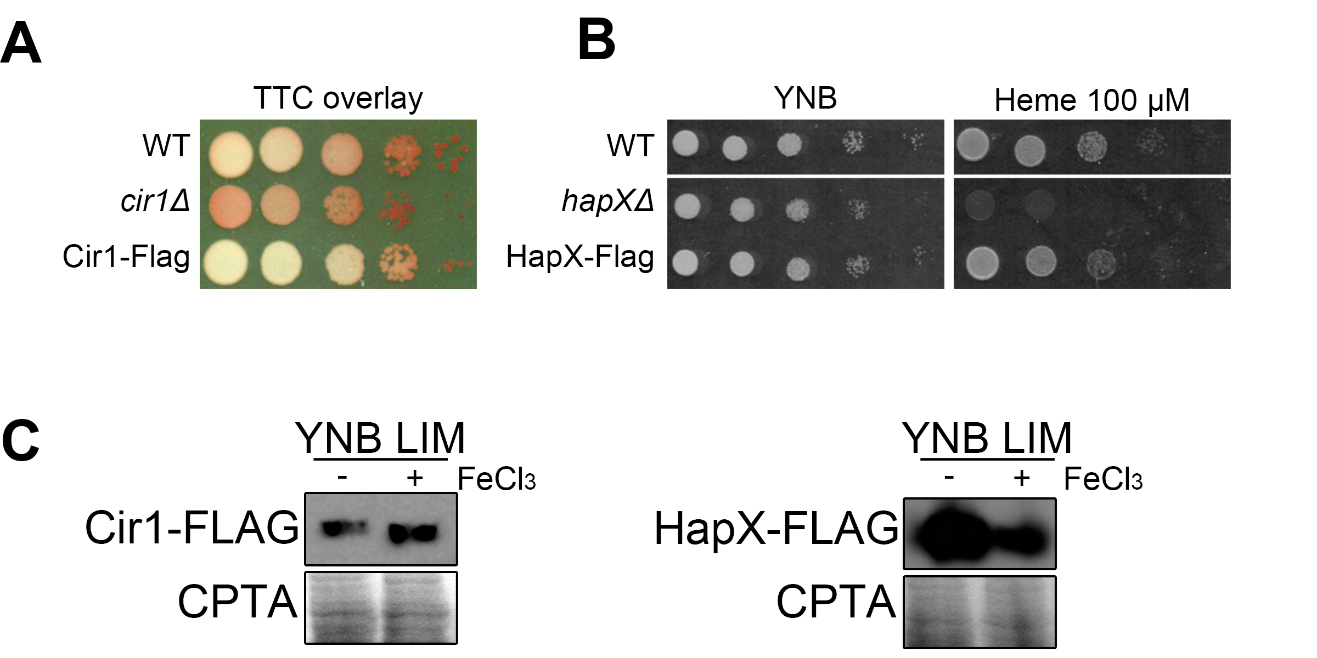


**Fig. S1.** Growth of strains producing Cir1-FLAG or HapX-FLAG was monitored in YPD with triphenyltetrazolium chloride (TTC) **(A)** or in YNB low-iron medium containing heme **(B),** respectively. Ten-fold serial dilutions of cells (starting at 105 cells) were spotted onto the plates and incubated at 30°C for 2 d. **(C)** The abundance of proteins fused with the FLAG epitope tag was determined by western blotting. The strains producing Cir1-FLAG or HapX-FLAG were incubated in YNB low-iron (– ) or high-iron (+100 μM FeCl3) medium at 30°C for 6 h. The membranes were stained with copper phthalocyanine-3,4ʹ,4ʺ,4ʹʺ-tetrasulfonic acid tetrasodium (CPTA) to stain the total protein, confirming equal loading of each sample.
